# Supplementary material for: Genome-wide identification and expression reveal the involvement of the FCS-like zinc finger (FLZ) gene family in Gossypium hirsutum at low temperature
Source: PeerJ journal article supplement (doi:10.7717/peerj.14690), 2023-01-23
Supplement: Fig_S1.pdf [file Fig_S1.pdf]

**Gossypium hirsutum**

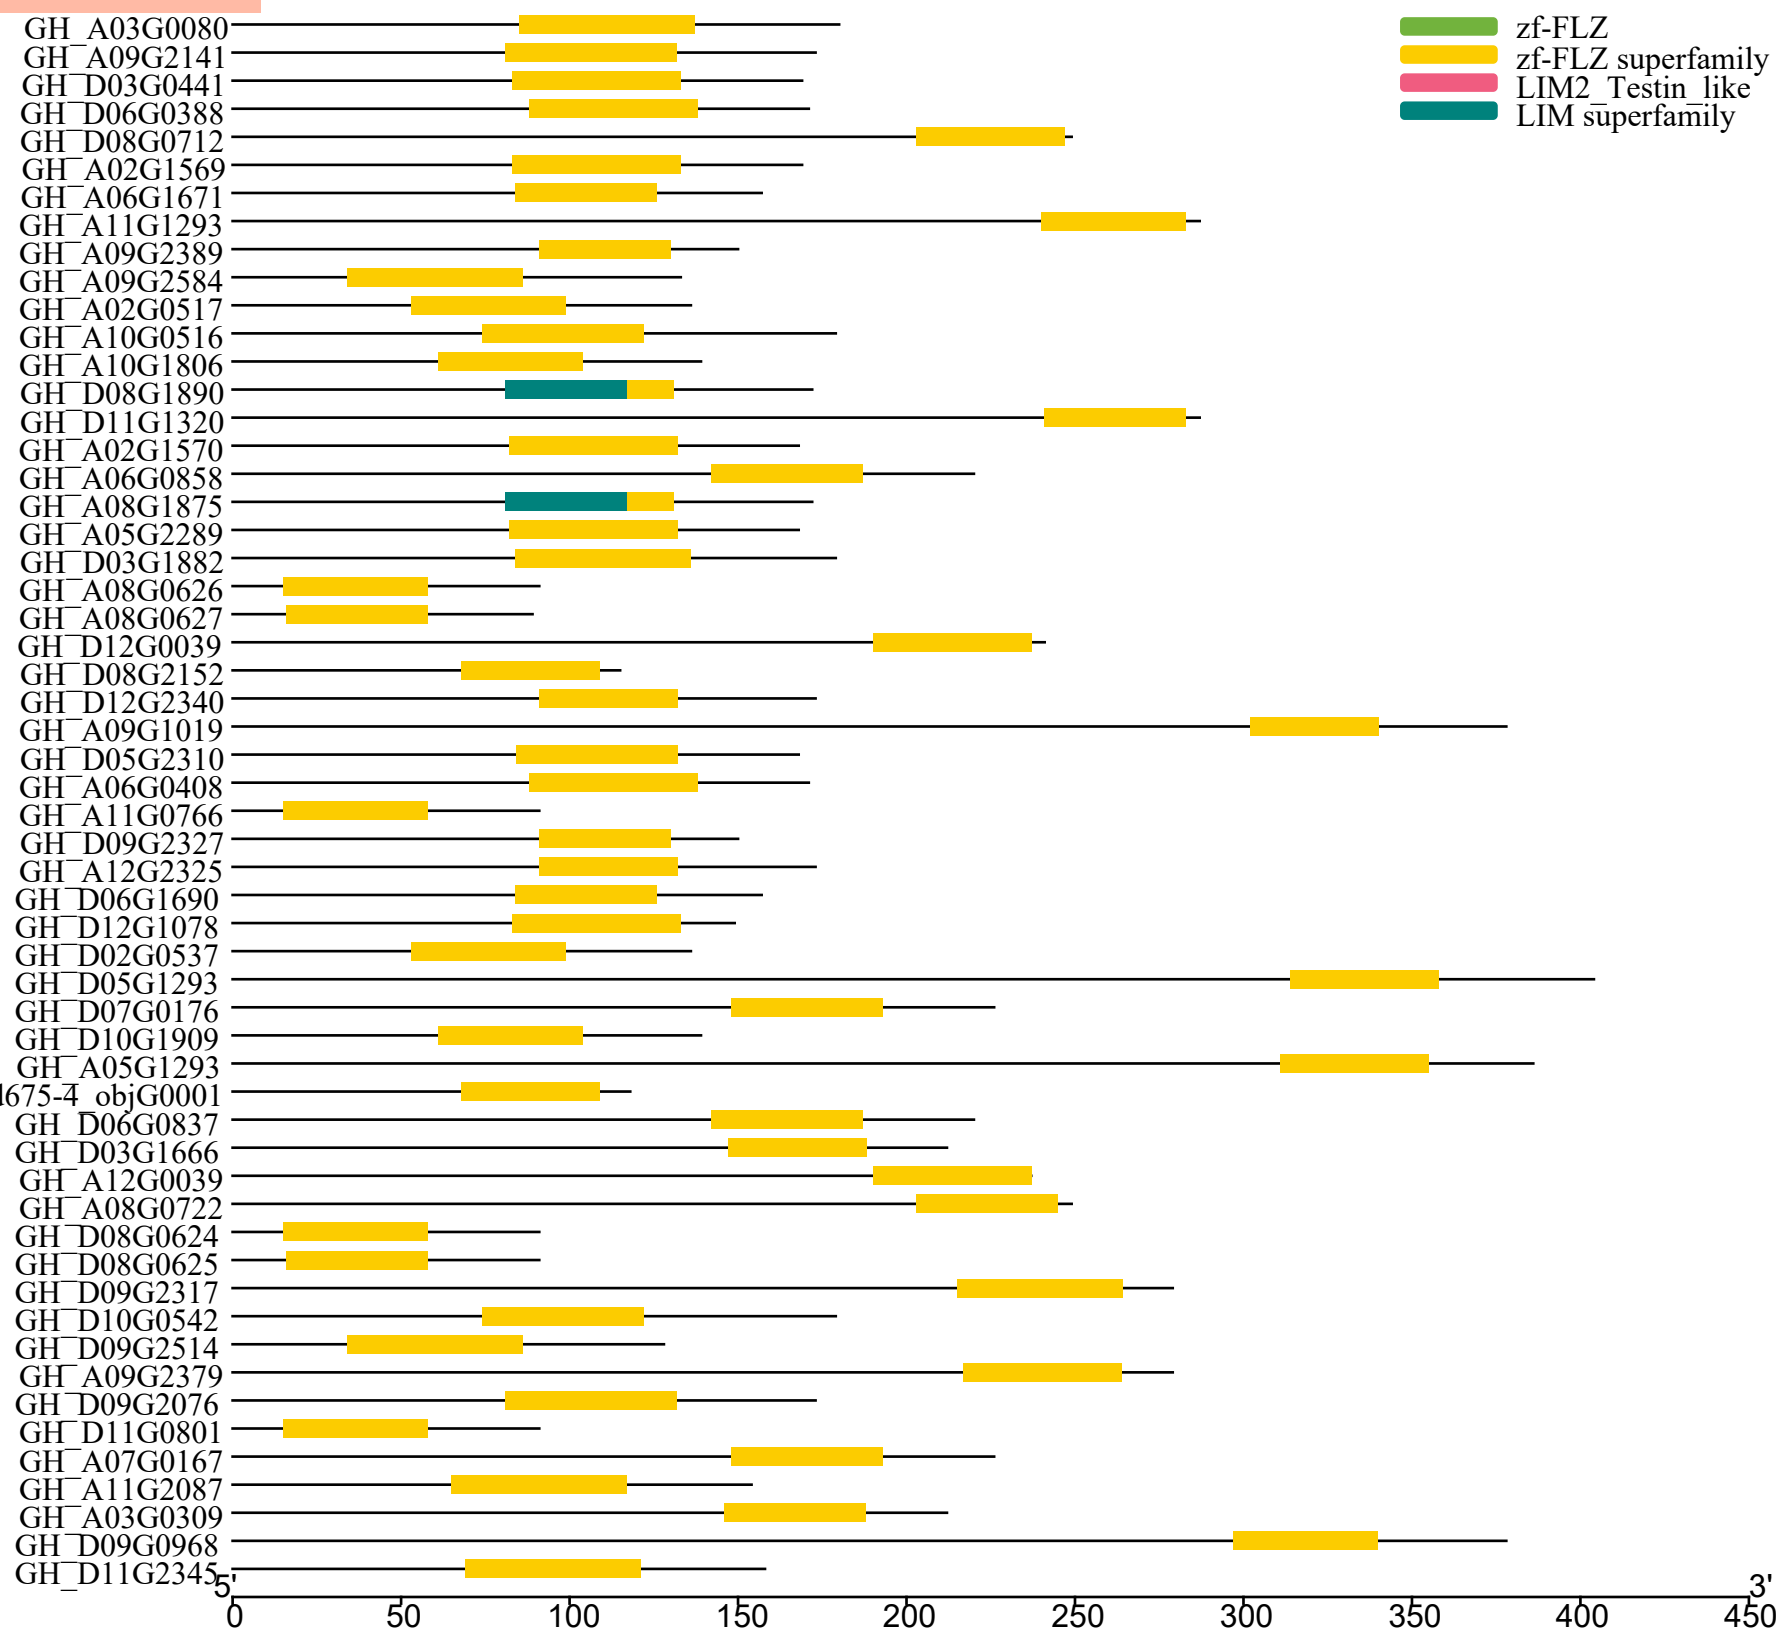

**Gossypium barbadense**

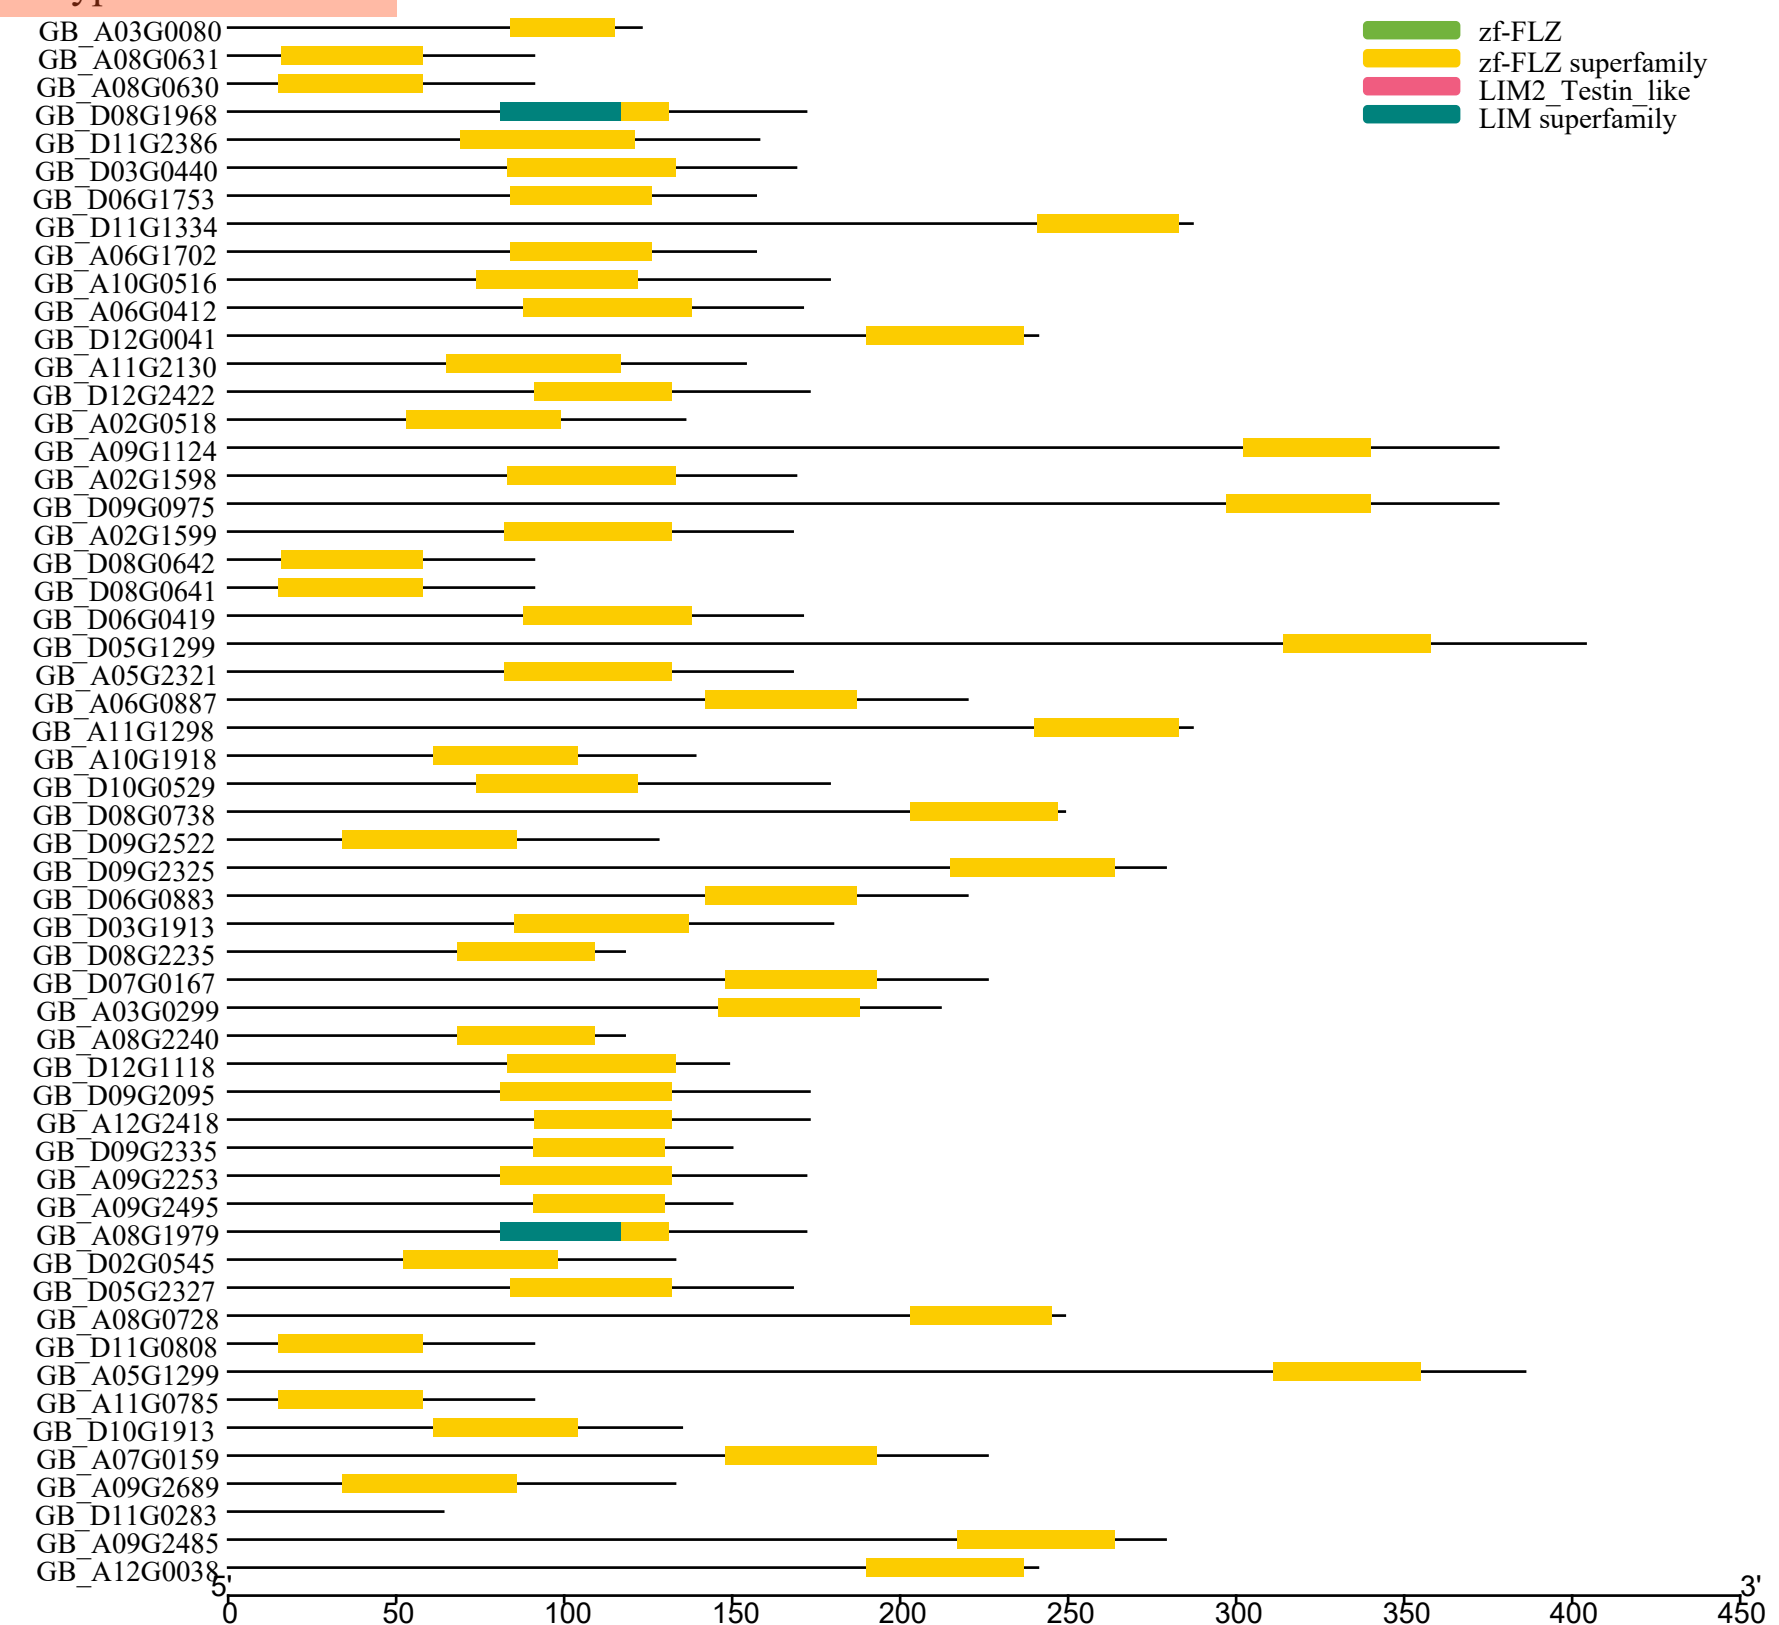

**Gossypium arboreum**

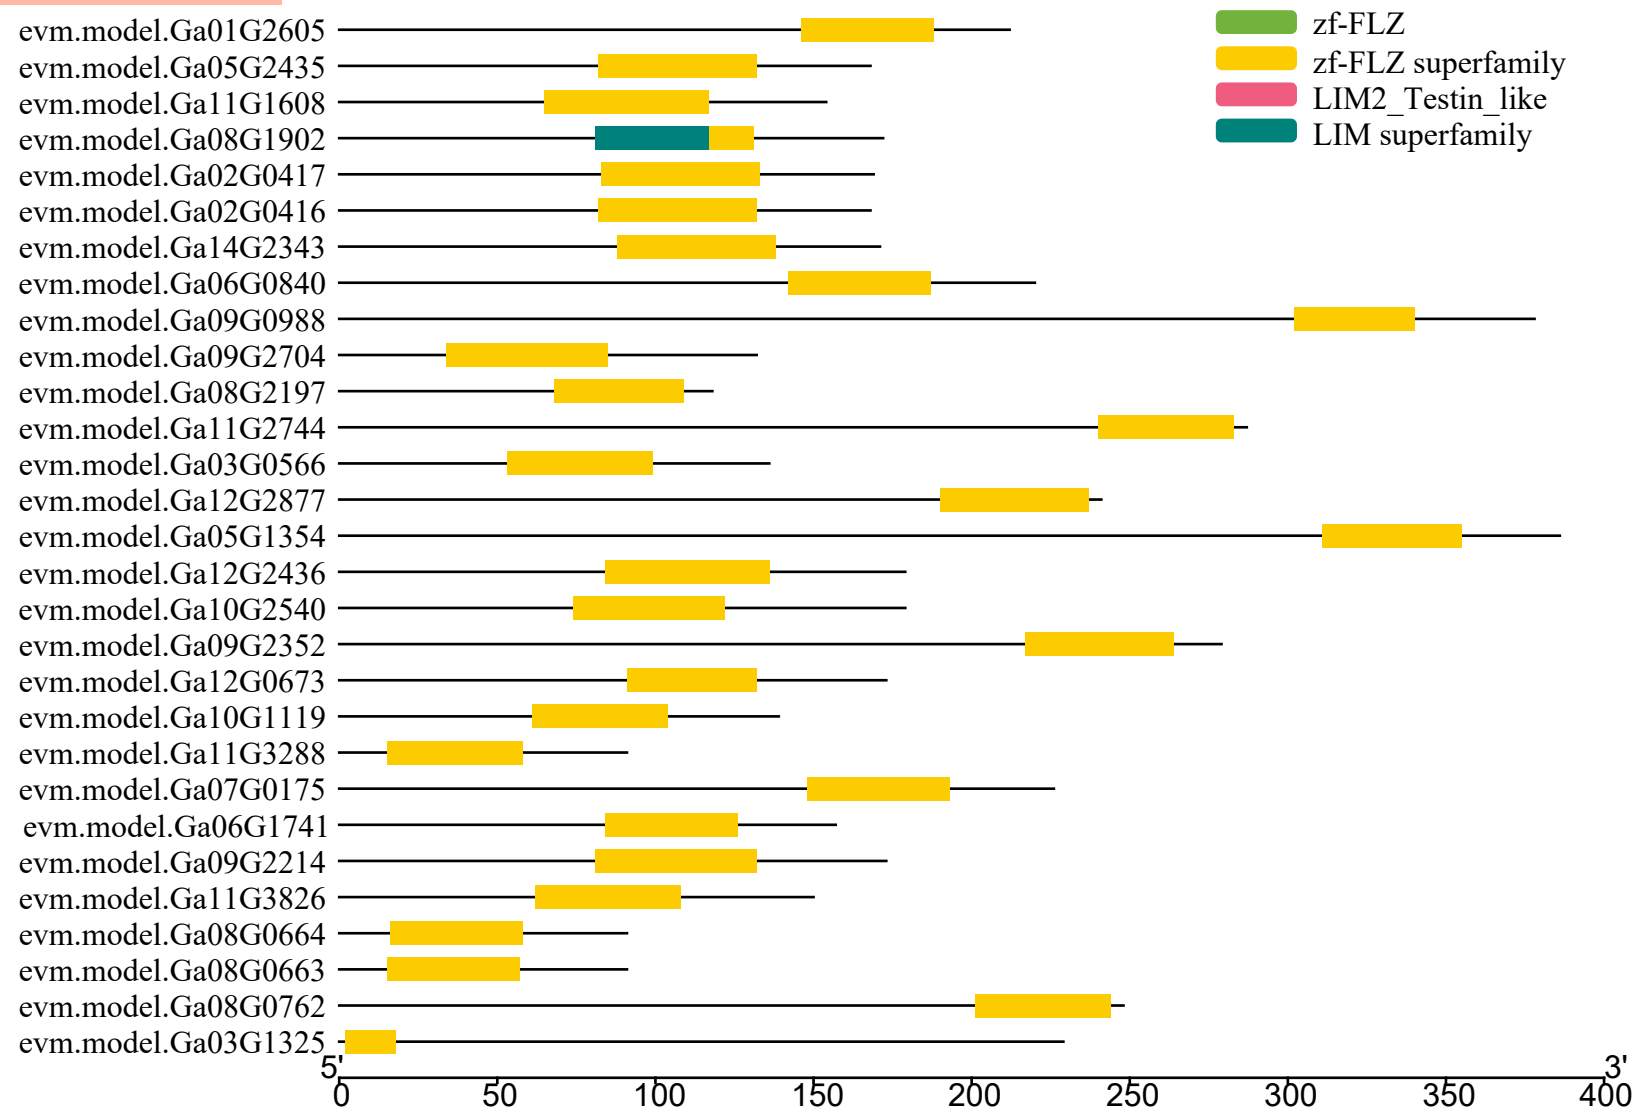

**Gossypium raimondii**

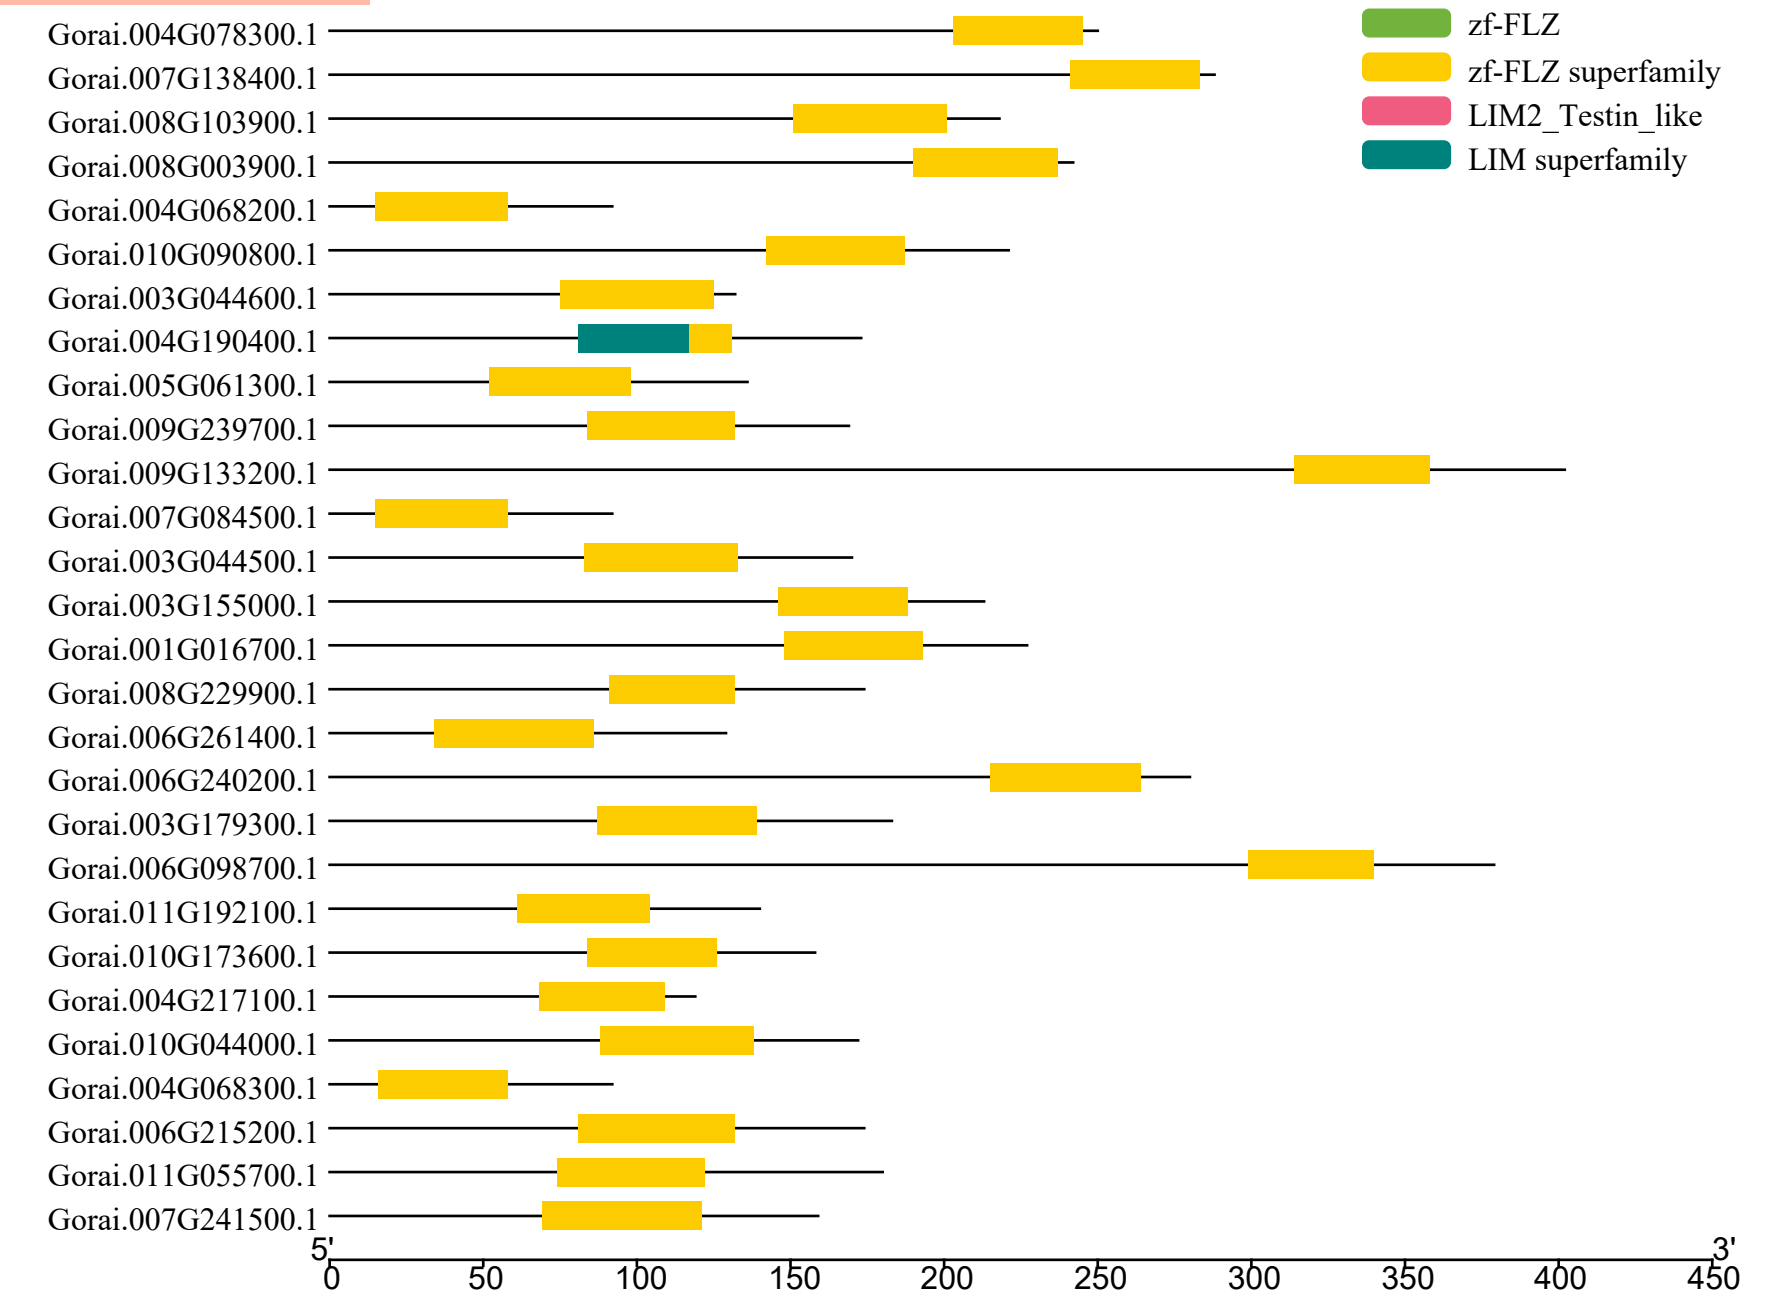

Fig S1. Distribution of the FLZ domain in the FLZ proteins of cotton.
