# Supplementary material for: Genome-wide identification and expression reveal the involvement of the FCS-like zinc finger (FLZ) gene family in Gossypium hirsutum at low temperature
Source: PeerJ journal article supplement (doi:10.7717/peerj.14690), 2023-01-23

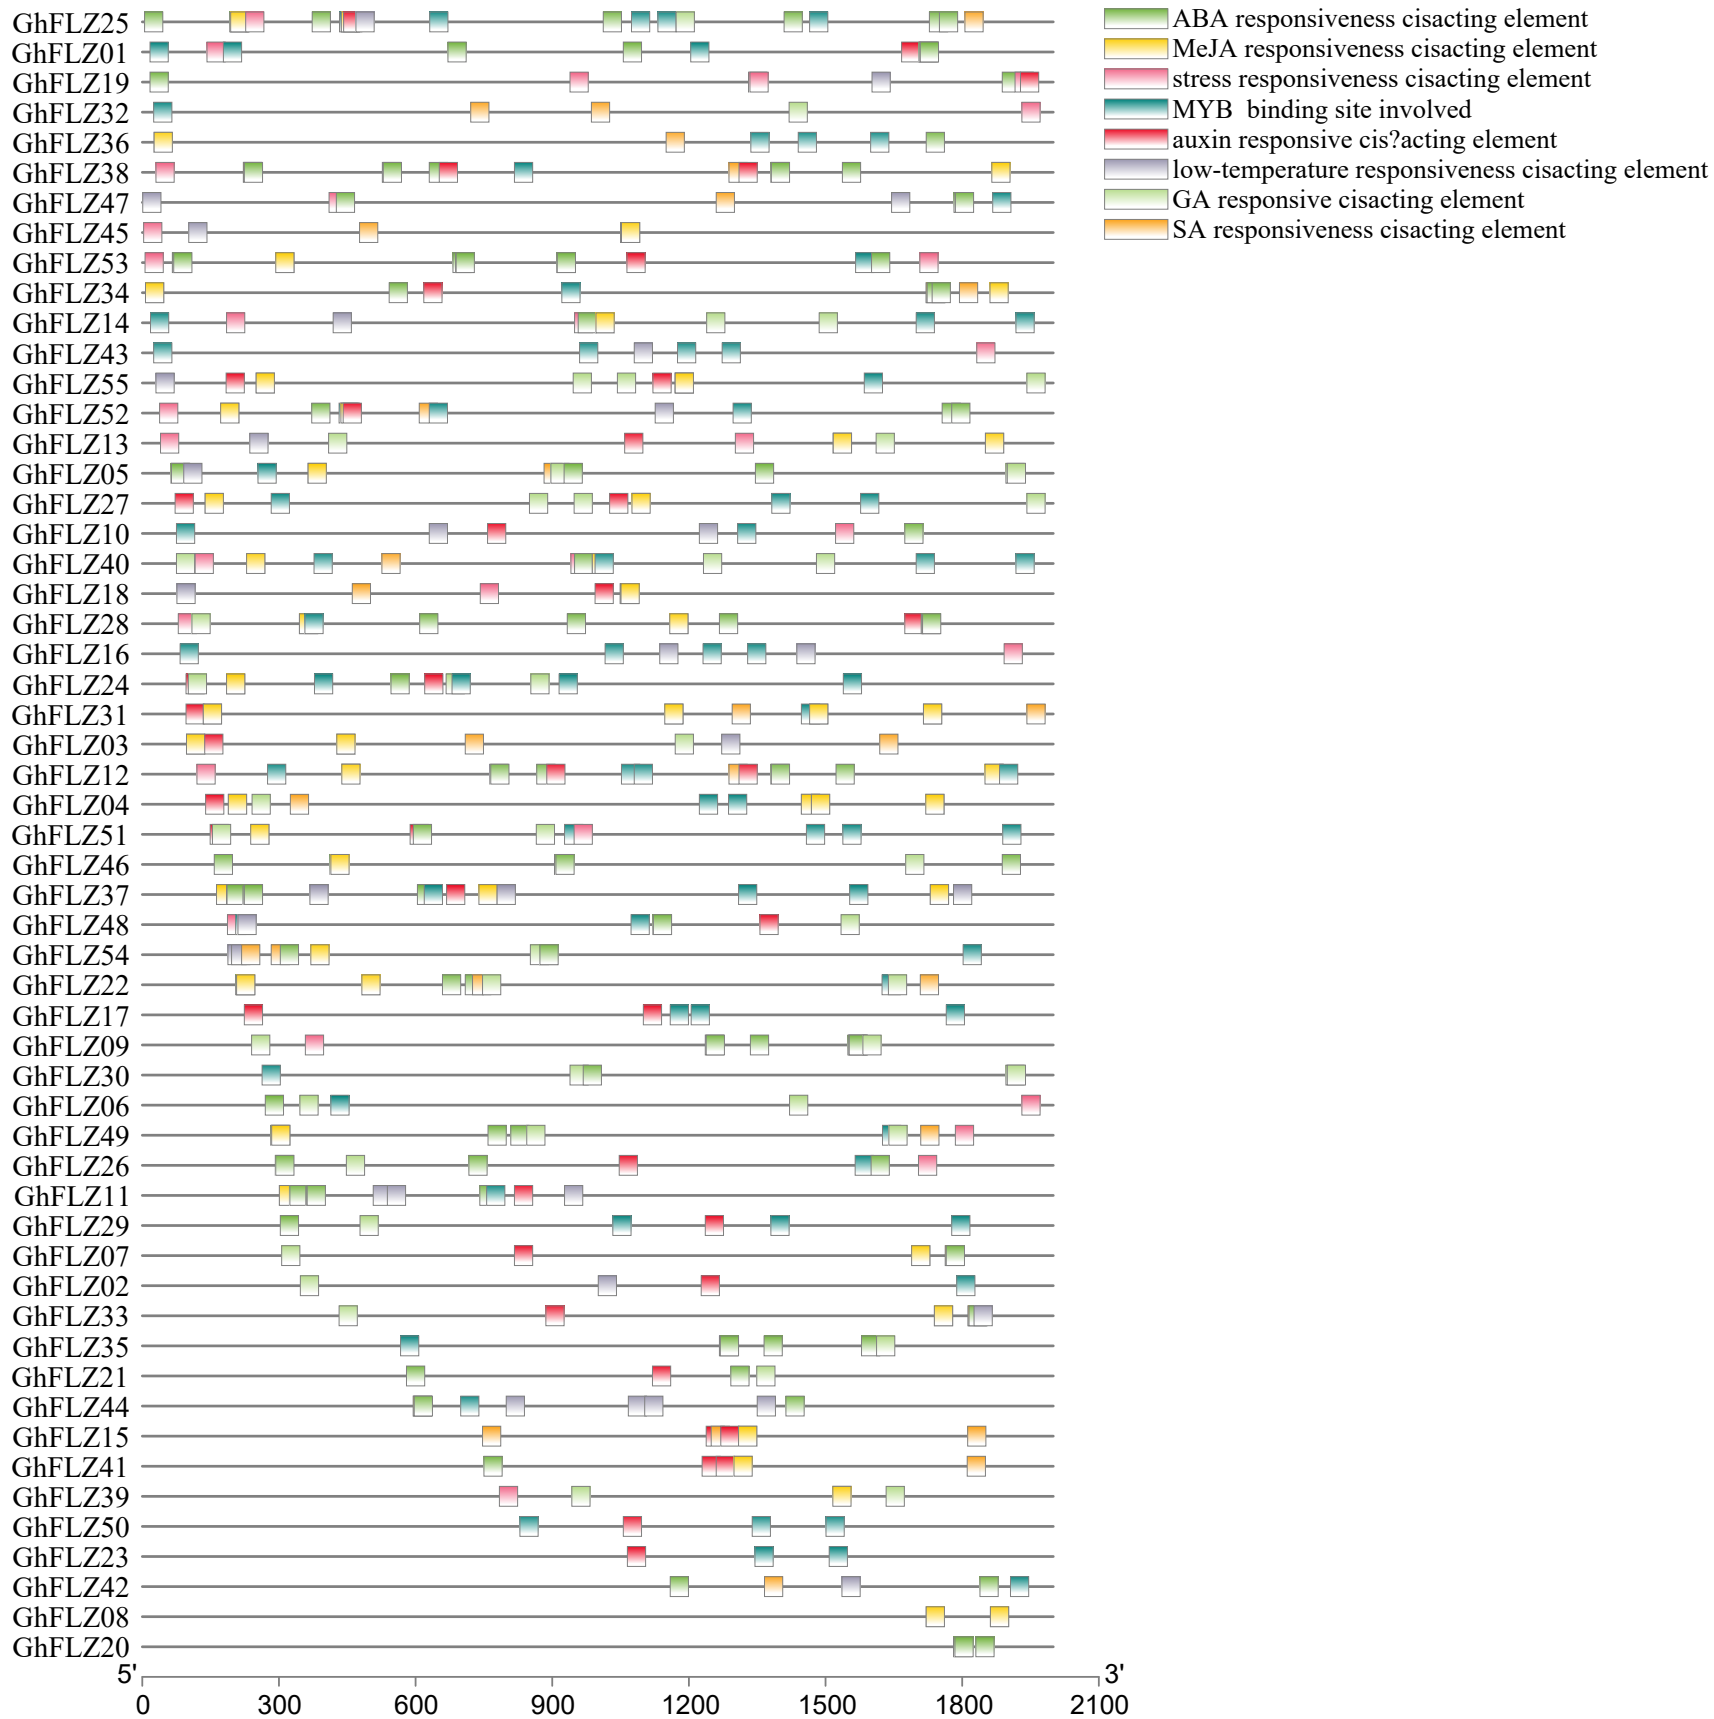

Supplement: Fig_S2.pdf [file Fig_S2.pdf]
