# Supplementary material for: Genome-wide identification and expression reveal the involvement of the FCS-like zinc finger (FLZ) gene family in Gossypium hirsutum at low temperature
Source: PeerJ. 2023 Jan 23;11:e14690. doi: 10.7717/peerj.14690 (PMC9879155; doi:10.7717/peerj.14690)
Supplement: Supplemental Information 4 [file peerj-11-14690-s004.xls]

## Sheet: Raw qRT-PCR data of FLZ gene in
Raw qRT-PCR data of FLZ gene in 86-1 and Lumian2 at low temperature
86-1		Ct-1	Ct-2	Ct-3				average	P-value	Lumian2		Ct-1	Ct-2	Ct-3				average	P-value
GhUBQ7	0h	21.6967	21.7924	21.6878						GhUBQ7	0h	22.4956	22.4154	22.389
	3h	21.4853	21.347	21.492							3h	22.1441	22.1225	22.2393
	6h	20.9976	21.1277	21.0016							6h	21.7669	21.7882	21.6395
	12h	20.6434	20.5949	20.6834							12h	21.2104	21.296	21.3342
	24h	19.9957	20.0956	20.112							24h	20.8581	20.7631	20.9134
GhFLZ03	0h	24.3575	24.3833	24.2124	1	1	1	1		GhFLZ03	0h	25.5537	25.6382	25.6715	1	1	1	1
	6h	23.9185	23.9387	23.8945	1.17086	0.999414	1.08835	1.08621	0.111868		6h	25.3678	25.3953	25.5212	0.891614	0.91594	1.05033	0.952628	0.138902
	12h	23.9868	24.0708	23.9079	0.796396	0.772601	0.783692	0.78423	0.000506699		12h	25.1814	25.2449	25.1751	0.781166	0.85032	0.839053	0.823513	0.00720759
	24h	24.1599	24.103	24.0399	0.552593	0.529512	0.561801	0.547969	0.000225528		24h	25.0072	25.1907	25.1908	0.599316	0.627679	0.671648	0.632881	0.00163451
	48h	22.8841	22.8365	22.7983	0.854041	0.901193	0.893996	0.883077	0.00768534		48h	24.2775	24.3841	24.4541	0.778461	0.758786	0.83607	0.791106	0.00604955
GhFLZ07	0h	25.6838	25.5834	25.7466	1	1	1	1		GhFLZ07	0h	28.8393	28.7578	28.8977	1	1	1	1
	6h	25.2258	24.9789	25.1937	1.18644	1.11663	1.28082	1.19463	0.0661921		6h	28.2974	28.3859	28.492	1.14109	1.03629	1.21412	1.1305	0.0514987
	12h	24.4359	24.1985	24.382	1.46286	1.64745	1.60043	1.57025	0.00465034		12h	27.6003	27.457	27.6324	1.42441	1.59497	1.42972	1.48303	0.00658571
	24h	24.1865	24.0007	24.3154	1.36041	1.30602	1.34423	1.33689	0.0114158		24h	27.1629	27.1658	27.3986	1.31157	1.33755	1.41056	1.35323	0.0219704
	48h	23.7163	23.605	23.8345	1.16195	1.19052	1.28015	1.21087	0.053161		48h	26.8882	26.8473	27.0215	1.24277	1.19595	1.32	1.25291	0.0599217
GhFLZ11	0h	23.1967	23.2275	23.0244	1	1	1	1		GhFLZ11	0h	27.7017	27.7877	27.851	1	1	1	1
	6h	22.4563	22.323	22.2548	1.44292	1.37474	1.48845	1.43537	0.00285494		6h	27.0221	27.176	27.2775	1.25536	1.24731	1.34136	1.28134	0.00562642
	12h	21.4507	21.4076	21.2833	2.06603	2.22719	2.07771	2.12364	0.00106259		12h	26.2237	26.3296	26.3046	1.68096	1.77885	1.7373	1.73237	0.00074843
	24h	20.0692	19.9881	20.1458	4.2111	4.11788	3.66617	3.99838	0.00156737		24h	24.8952	25.0378	25.1634	2.87044	3.09618	3.10098	3.02253	0.000705603
	48h	20.6804	20.8508	20.7022	1.7596	1.60196	1.67767	1.67974	0.00222731		48h	25.6675	25.7508	25.8906	1.31639	1.30554	1.39935	1.34043	0.00374441
GhFLZ24	0h	25.9526	25.7394	25.8579	1	1	1	1		GhFLZ24	0h	24.818	24.766	24.8951	1	1	1	1
	6h	25.2758	24.9582	25.3104	1.38072	1.26213	1.27613	1.30633	0.00729572		6h	24.0407	23.9138	24.245	1.3433	1.4735	1.41451	1.41044	0.0041533
	12h	24.2721	24.134	24.3116	1.97438	1.91954	1.81523	1.90305	0.00133042		12h	23.2395	23.2551	23.357	1.80221	1.84505	1.72727	1.79151	0.000942783
	24h	24.2013	23.8464	24.2122	1.62225	1.6195	1.55976	1.6005	0.000575271		24h	23.0304	23.1172	23.2645	1.41658	1.44332	1.49044	1.45011	0.00114641
	48h	23.8937	23.8544	23.9995	1.28155	1.13933	1.21643	1.21244	0.0677283		48h	22.812	22.7099	22.988	1.29095	1.323	1.34857	1.32084	0.00134404
GhFLZ25	0h	27.1752	27.2838	27.0974	1	1	1	1		GhFLZ25	0h	29.0663	28.9267	29.0785	1	1	1	1
	6h	26.6486	26.6051	26.5866	1.24422	1.17556	1.24403	1.22127	0.00525127		6h	28.3655	28.1002	28.4532	1.27399	1.44758	1.39051	1.37069	0.00923262
	12h	26.108	26.0383	25.9551	1.29067	1.49573	1.3719	1.3861	0.00815117		12h	27.482	27.4625	27.5686	1.80955	1.78638	1.69388	1.76327	0.00106793
	24h	25.3227	25.2257	25.2398	1.74013	1.81576	1.80656	1.78748	0.000457022		24h	26.4871	26.4685	26.774	2.45218	2.52931	2.37796	2.45315	0.000451478
	48h	25.2664	25.399	25.4554	1.15494	1.13914	1.04695	1.11368	0.0688329		48h	26.9954	26.94	27.1595	1.35035	1.26086	1.35978	1.32366	0.004676
GhFLZ33	0h	27.9643	27.8912	27.8037	1	1	1	1		GhFLZ33	0h	25.2841	25.4365	25.3183	1	1	1	1
	6h	27.238	26.9953	27.0563	1.42896	1.36653	1.46578	1.42043	0.0023571		6h	24.5185	24.6387	24.6945	1.33248	1.419	1.38897	1.38015	0.00221102
	12h	26.362	26.3326	26.2005	1.87023	1.8582	1.88823	1.87222	5.00292e-05		12h	23.8068	23.9908	23.7079	1.68015	1.76356	1.81607	1.75326	0.00137421
	24h	25.6373	25.5702	25.5687	2.41789	2.17873	2.34667	2.31443	0.00144823		24h	22.7599	22.993	22.9299	2.3604	2.50367	2.52021	2.46143	0.000601567
	48h	26.1009	25.961	26.0139	1.11919	1.17556	1.15993	1.15156	0.060033		48h	23.1575	23.3833	23.3724	1.40359	1.32035	1.38532	1.36975	0.00231715
GhFLZ37	0h	21.1961	21.1092	21.0411	1	1	1	1		GhFLZ37	0h	25.0163	25.065	25.1645	1	1	1	1
	6h	20.5819	20.3994	20.5467	1.32205	1.20115	1.23	1.25107	0.0502192		6h	24.4586	24.5789	24.6937	1.15367	1.09328	1.29918	1.18204	0.0663021
	12h	20.3275	20.3404	20.3441	1.12468	1.07481	1.00753	1.06901	0.0895337		12h	24.0859	24.2385	24.3237	1.15002	1.19809	1.01525	1.12112	0.0546563
	24h	19.8902	19.7045	19.9741	1.19134	1.15445	1.04434	1.13004	0.0592715		24h	23.6565	23.9677	23.9954	1.05308	0.98473	1.08239	1.04007	0.150177
	48h	19.2023	19.2849	19.3953	1.22505	1.09233	1.04975	1.12238	0.073158		48h	23.2838	23.3834	23.4466	1.06803	1.02047	1.18283	1.09044	0.100681
GhFLZ44	0h	27.449	27.5262	27.3477	1	1	1	1		GhFLZ44	0h	23.1204	23.2508	23.2022	1	1	1	1
	6h	25.9031	25.7832	25.7616	2.52198	2.45827	2.6215	2.53392	0.000478678		6h	22.0063	22.103	22.1548	1.69663	1.80871	1.86293	1.78942	0.00191265
	12h	24.2958	24.3943	24.268	5.47994	5.52992	5.25459	5.42148	0.000183321		12h	20.5057	20.6976	20.3593	3.69616	3.79997	4.26733	3.92115	0.00179834
	24h	23.2235	23.0562	23.1625	9.01443	9.66344	9.06799	9.24862	0.000317586		24h	19.2092	19.4021	19.3718	6.17341	6.63128	6.84745	6.55071	0.000639507
	48h	24.2084	24.1952	24.1205	2.90712	3.10404	3.14139	3.05085	0.000626589		48h	20.3567	20.5575	20.5944	2.18291	2.05764	2.19177	2.14411	0.000714895
GhFLZ45	0h	24.1257	23.9882	24.1095	1	1	1	1		GhFLZ45	0h	26.7237	26.5943	26.7695	1	1	1	1
	6h	23.8981	23.7135	23.9672	1.01133	0.8884	0.963637	0.954456	0.165519		6h	26.4458	26.5182	26.6804	0.950298	0.860497	0.958827	0.923207	0.0673362
	12h	23.4866	23.5648	23.6205	0.959289	0.846003	0.872272	0.892521	0.0541169		12h	26.3421	26.194	26.2416	0.786176	0.804473	0.907553	0.832734	0.0694254
	24h	23.4017	23.2692	23.4935	0.795927	0.717736	0.763985	0.759216	0.00438453		24h	26.0213	26.0064	26.2722	0.667679	0.691838	0.679441	0.679653	0.000236867
	48h	22.5892	22.3561	22.5279	0.892259	0.956098	1.00404	0.950797	0.133967		48h	25.1526	25.0394	25.3079	0.955024	0.934698	0.990276	0.959999	0.0663623
GhFLZ50	0h	26.6866	26.468	26.5143	1	1	1	1		GhFLZ50	0h	28.7164	28.699	28.8354	1	1	1	1
	6h	26.1636	25.8036	25.9822	1.24115	1.16396	1.26252	1.22254	0.00880945		6h	28.2186	28.2451	28.4666	1.10676	1.07809	1.20397	1.12961	0.0788637
	12h	25.8046	25.684	25.6021	1.13525	1.08626	1.16963	1.13038	0.0163719		12h	27.628	27.8983	27.7951	1.28317	1.1278	1.2233	1.21142	0.0214369
	24h	25.3651	25.0888	25.2073	1.20435	1.13425	1.23331	1.19064	0.0114902		24h	27.4027	27.3957	27.6598	1.01995	1.13591	1.08734	1.08107	0.0687086
	48h	24.8843	24.7067	24.7343	1.07281	1.04571	1.15206	1.09019	0.052839		48h	26.9552	26.8838	27.0674	1.08951	1.09951	1.25465	1.14456	0.0658941
GhFLZ51	0h	23.4389	23.3491	23.3961	1	1	1	1		GhFLZ51	0h	27.8809	27.971	27.7839	1	1	1	1
	6h	23.271	23.0387	23.195	0.970333	0.910684	1.00376	0.961592	0.146856		6h	27.428	27.4953	27.6563	1.07284	1.13509	0.984768	1.06423	0.139324
	12h	22.702	22.6947	22.7731	1.02659	0.992913	0.957191	0.99223	0.367776		12h	27.272	27.3126	27.0305	0.920299	1.02184	1.00263	0.98159	0.307162
	24h	22.2569	22.1008	22.2251	1.09335	1.03587	1.12241	1.08388	0.0504517		24h	26.5973	26.8802	26.7287	0.998899	0.980347	1.00023	0.993159	0.199021
	48h	21.7039	21.8188	21.8215	1.02392	0.890967	0.999202	0.971365	0.277846		48h	26.1643	26.1912	26.3337	1.05632	1.09239	0.982495	1.04373	0.154453
GhFLZ55	0h	26.1456	26.061	26.2929	1	1	1	1		GhFLZ55	0h	22.2823	22.1949	22.3253	1	1	1	1
	6h	23.5201	23.3199	23.6436	5.33029	4.90998	5.47725	5.23917	0.000801948		6h	21.7319	21.6094	21.8067	1.08778	1.22488	1.35131	1.22133	0.0566823
	12h	23.3274	23.3957	23.5051	4.34454	4.00172	4.29185	4.2127	0.000549408		12h	21.5175	21.4104	21.3241	1.02533	1.11518	1.19051	1.11034	0.073519
	24h	23.9053	23.7328	23.9502	2.27697	2.1896	2.52853	2.3317	0.00288503		24h	20.6102	20.5945	20.8741	1.30755	1.43572	1.27613	1.3398	0.0433778
	48h	24.1276	24.1573	24.376	1.24581	1.15416	1.26666	1.22221	0.0516677		48h	20.3161	20.1392	20.5411	1.25584	1.37264	1.18844	1.2723	0.0543828

## Sheet: FLZ gene in 86-1 and Lumian2 ro
FLZ gene in 86-1 and Lumian2 root, stem, and leaf qRT-PCR raw data
86-1		Ct-1	Ct-2	Ct-3				average	P-value	Lumian2		Ct-1	Ct-2	Ct-3				average	P-value
GhUBQ7	Root	21.1566	21.292	21.2615						GhUBQ7	Root	20.9999	20.9647	21.1063
	Stem	21.345	21.4663	21.4368							Stem	20.293	20.4249	20.3119
	Leaf	21.6967	21.7924	21.6878							Leaf	22.4956	22.4154	22.389
GhFLZ11	Root	24.9282	24.8492	24.7272	1	1	1	1		GhFLZ11	Root	24.8626	24.9015	24.9844	1	1	1	1
	Stem	26.4249	26.0963	26.1663	0.403794	0.47538	0.416424	0.431866	0.000752183		Stem	26.151	26.2508	25.8366	0.250826	0.269976	0.319401	0.280068	0.000402121
	Leaf	23.7943	23.74	23.5115	3.19087	3.05181	3.12085	3.12118	0.000179		Leaf	25.4222	25.1434	25.093	1.91347	2.31156	2.16472	2.12991	0.00520818
GhFLZ25	Root	22.5638	22.5474	22.5354	1	1	1	1		GhFLZ25	Root	25.4277	25.4539	25.6048	1	1	1	1
	Stem	24.4878	24.3324	24.3972	0.300294	0.327436	0.310676	0.312802	6.61799e-05		Stem	26.006	26.2489	26.0556	0.41032	0.396435	0.421872	0.409542	7.75291e-05
	Leaf	23.2294	23.2381	23.122	0.916706	0.876381	0.894798	0.895962	0.00615953		Leaf	27.2733	27.3543	27.0539	0.784666	0.732181	0.854818	0.790555	0.0137917
GhFLZ44	Root	24.5206	24.6517	24.4432	1	1	1	1		GhFLZ44	Root	21.2733	21.3243	21.4749	1	1	1	1
	Stem	25.8729	25.9709	26.0614	0.446337	0.452233	0.367823	0.422131	0.0011047		Stem	21.9616	22.0521	22.2983	0.380189	0.415342	0.32583	0.373787	0.00086218
	Leaf	22.4393	22.6829	22.2979	6.15338	5.53731	5.94465	5.87845	0.000686092		Leaf	21.9603	21.9635	21.7224	1.75158	1.75496	1.96588	1.82414	0.00365773
GhFLZ55	Root	24.8626	24.9015	24.9844	1	1	1	1		GhFLZ55	Root	26.4742	26.5898	26.5677	1	1	1	1
	Stem	26.39	26.4188	26.2366	0.395321	0.394205	0.474025	0.421184	0.00103871		Stem	25.9883	26.1224	26.0845	0.857998	0.971028	0.786003	0.871676	0.057053
	Leaf	23.9222	23.7534	23.973	2.79056	3.13526	2.70883	2.87822	0.00240262		Leaf	27.9179	28.1127	27.9455	1.03671	0.951159	0.898124	0.961998	0.222956
